# Supplementary material for: Ice nucleating particles over the Eastern Mediterranean measured by unmanned aircraft systems
Source: Copernicus journal article supplement (doi:10.5194/acp-2016-1098), 2016-12-07
Supplement: Supplementary file 1 [file acp-2016-1098-supplement.zip]

# Supplementary Material: Ice nucleating particles over the Eastern Mediterranean measured by unmanned aircraft systems

Jann Schrod<sup>1</sup>, Daniel Weber<sup>1</sup>, Jaqueline Drücke<sup>1</sup>, Christos Keleshis<sup>2</sup>, Michael Pikridas<sup>2</sup>, Martin Ebert<sup>3</sup>, Bojan Cvetković<sup>4</sup>, Slobodan Nickovic<sup>4</sup>, Eleni Marinou<sup>5,6</sup>, Holger Baars<sup>7</sup>, Mihalis Vrekoussis<sup>2,8,9</sup>, Nikos Mihalopoulos<sup>2,10</sup>, Jean Sciare<sup>2</sup>, Joachim Curtius<sup>1</sup>, and Heinz G. Bingemer<sup>1</sup>

<sup>1</sup>Institute for Atmospheric and Environmental Sciences, Goethe University Frankfurt, 60438 Frankfurt am Main, Germany

<sup>2</sup>Energy, Environment and Water Research Center, The Cyprus Institute, Nicosia, 2121 Aglantzia, Cyprus

<sup>3</sup>Institute for Applied Geosciences, Technical University of Darmstadt, 64287 Darmstadt, Germany

<sup>4</sup>Republic Hydrometeorological Service of Serbia, 11000 Belgrade, Serbia

<sup>5</sup>Institute for Astronomy, Astrophysics, Space Applications and Remote Sensing, National Observatory of Athens, 15236 Athens, Greece

<sup>6</sup>Department of Physics, Aristotle University of Thessaloniki, 54124 Thessaloniki, Greece

<sup>7</sup>Leibniz Institute for Tropospheric Research, 04318 Leipzig, Germany

<sup>8</sup>Institute of Environmental Physics and Remote Sensing - IUP, University of Bremen, 28359 Bremen, Germany

<sup>9</sup>Center of Marine Environmental Sciences - MARUM, University of Bremen, 28359 Bremen, Germany

<sup>10</sup>Institute for Environmental Research and Sustainable Development, National Observatory of Athens, 15236 Athens, Greece

*Correspondence to:* Jann Schrod (schrod@iau.uni-frankfurt.de)

## Supplementary Material

– Movie: S1\_DREAM\_dust\_month.wmv
